# Supplementary material for: Identification of traits and functional connectivity-based neurotraits of chronic pain
Source: PubMed Central journal article supplement (PMC6701751; doi:10.1371/journal.pbio.3000349), 2019-08-20
Supplement: pbio.3000349.s007.pdf [file pbio.3000349.s007.pdf]

|               | <b>Phone</b>   | <b>Memory</b>  | <b>NRS</b>       | <b>MPQa</b>    | <b>MPQs</b>     | <b>Pain Detect</b> | <b>PANAS/n</b>  | <b>BDI</b>     | <b>SF-12p</b>    |
|---------------|----------------|----------------|------------------|----------------|-----------------|--------------------|-----------------|----------------|------------------|
| Group 1       | 6.00<br>(1.21) | 6.86<br>(1.49) | 57.95<br>(22.16) | 3.07<br>(2.87) | 13.38<br>(5.66) | 11.02<br>(6.20)    | 18.82<br>(6.47) | 7.76<br>(5.94) | 49.44<br>(9.25)  |
| Group 2       | n/a            | n/a            | 50.56<br>(26.28) | 3.28<br>(3.46) | 12.52<br>(7.66) | 11.00<br>(7.77)    | 16.57<br>(6.06) | 7.62<br>(7.69) | 40.23<br>(10.00) |
| <i>p vals</i> | <i>n/a</i>     | <i>n/a</i>     | <i>0.12</i>      | <i>0.72</i>    | <i>0.50</i>     | <i>0.99</i>        | <i>0.07</i>     | <i>0.92</i>    | <i>&lt;0.001</i> |
