# Supplementary material for: Identification of traits and functional connectivity-based neurotraits of chronic pain
Source: PubMed Central journal article supplement (PMC6701751; doi:10.1371/journal.pbio.3000349), 2019-08-20
Supplement: pbio.3000349.s008.pdf [file pbio.3000349.s008.pdf]

| Figure panel | Tests                                                                                                                                                             |
|--------------|-------------------------------------------------------------------------------------------------------------------------------------------------------------------|
| 1b           | Covariance matrix generated from Pearson correlations                                                                                                             |
| 1c           | Network constructed from strongest 10% of correlations                                                                                                            |
| 1d           | Principle Component Analysis were performed using varimax rotation making the components orthogonal                                                               |
| 2a-b         | Pearson correlations between each trait and pain measurements                                                                                                     |
| 3a           | Variance explained using Pearson correlation between the chronic pain traits and the derived neurotraits in the test set                                          |
| 4a-b         | Pearson correlations between chronic pain traits and neurotrait at each visit                                                                                     |
| 5a           | Principle Component Analysis were performed using varimax rotation making the components orthogonal                                                               |
| 5b,c         | Pearson correlations between each neurotrait and pain measurements                                                                                                |
| 5d,e         | Pearson partial correlations between Neurotrait 1 & 2 with and pain measurements after controlling for Neurotrait 3                                               |
| 5f,g         | Pearson partial correlations between Neurotrait 3 with and pain measurements after controlling for Neurotrait 1 & 2.                                              |
| 6a           | One-way ANCOVA for pain trait controlling for race/ethnicity and education: $F_{(3,44)} = 4.20, p = 0.01$                                                         |
| 6b           | Two sample ttest: $t_{(40)} = 2.30; p = 0.03$                                                                                                                     |
| 6c           | One-way ANOVA for pain trait controlling for ethnicity: <i>Neurotrait 1</i> , $F_{(3,40)} = 3.57, p = 0.02$ ; <i>Neurotrait 2</i> , $F_{(3,40)} = 2.62, p = 0.06$ |
| 6d           | Spearman correlations between income and psychological factors                                                                                                    |
