# Supplementary material for: Identification of traits and functional connectivity-based neurotraits of chronic pain
Source: PLOS journal article supplement (doi:10.1371/journal.pbio.3000349), 2019-08-20
Supplement: S5 (10.1371/journal.pbio.3000349.s005) [file journal.pbio.3000349.s005]

|               | <b>Age (years)</b> | <b>Female (%)</b> | <b>Pain duration (months)</b> | <b>Education (years)</b> |
|---------------|--------------------|-------------------|-------------------------------|--------------------------|
| Group1        | 46.1 (12.5)        | 42%               | 55.0 (74.1)                   | 13.7 (2.3)               |
| Group2        | 50.8 (10.3)        | 43%               | 64.26 (67.94)                 | 13.8 (2.1)               |
| <i>p vals</i> | 0.03               | 0.87              | 0.51                          | 0.74                     |
